# Supplementary material
Source: PubMed Central journal article supplement (PMC6374846)
Supplement: 804724_Supplemental_material.pdf [file 804724_Supplemental_material.pdf]

**Supplementary Table 1: Raw Endoscopist Data**

| <b>Endoscopist 1</b>       |           |
|----------------------------|-----------|
| Mean patient age (years)   | 60.7      |
| <b>Location of polyp</b>   |           |
| Right colon (%)            | 8 (44.4)  |
| Left colon (%)             | 10 (65.6) |
| Mean size of polyp (mm)    | 29.8      |
| <b>Endoscopist 2</b>       |           |
| Mean patient age (years)   | 71.0      |
| <b>Location of polyp</b>   |           |
| Right colon (%)            | 5 (35.7)  |
| Left colon (%)             | 9 (64.3)  |
| Mean size of polyp (mm)    | 29.6      |
| <b>Endoscopist 3</b>       |           |
| Mean patient age (years)   | 65.5      |
| <b>Location of polyp</b>   |           |
| Right colon (%)            | 16 (69.6) |
| Left colon (%)             | 7 (30.4)  |
| Mean size of polyp (mm)    | 42.8      |
| <b>Endoscopist 4</b>       |           |
| Median patient age (years) | 64.7      |
| <b>Location of polyp</b>   |           |
| Right colon (%)            | 32 (66.7) |
| Left colon (%)             | 16 (33.3) |
| Mean size of polyp (mm)    | 34.3      |

**Supplementary Table 2: Raw Polyp Data**

| Patient and polyp characteristics | Aggregated | AM   | PM   | P-value |
|-----------------------------------|------------|------|------|---------|
| Mean patient age (years)          | 64.6       | 63.7 | 66.8 | 0.18    |
| Location of polyp                 |            |      |      |         |
| Right colon (%)                   | 59.2       | 61.6 | 53.3 | 0.51    |
| Left colon (%)                    | 40.8       | 38.4 | 46.7 |         |
| Mean size of polyp (mm)           | 35.3       | 35.4 | 35.2 | 0.95    |
